# Supplementary material for: Comparison of Immuno-PET of CD138 and PET imaging with 64CuCl2 and 18F-FDG in a preclinical syngeneic model of multiple myeloma
Source: PubMed Central journal article supplement (PMC5823645; doi:10.18632/oncotarget.23886), 2018-01-03
Supplement: oncotarget-09-9061-s001.pdf [file oncotarget-09-9061-s001.pdf]

## Comparison of Immuno-PET of CD138 and PET imaging with $^{64}\text{CuCl}_2$ and $^{18}\text{F}$ -FDG in a preclinical syngeneic model of multiple myeloma

### SUPPLEMENTARY MATERIALS

**Supplementary Table 1: Different PET imaging conducted in mice and lesions visualized on the different imaging methods**

|                                    | Bioluminescence imaging | $^{18}\text{F}$ -FDG-PET | $^{64}\text{CuCl}_2$ | $^{64}\text{Cu}$ -TE2A-9E7.4 |
|------------------------------------|-------------------------|--------------------------|----------------------|------------------------------|
| <i>Subcutaneous tumor model</i>    |                         |                          |                      |                              |
| Mouse 1                            |                         | Sc x 2                   |                      | Sc x 2                       |
| Mouse 2                            |                         | Sc x 2, Ln               |                      | Sc x 2, Ln                   |
| Mouse 3                            |                         | Sc x 2                   |                      | Sc x 2                       |
| Mouse 4                            |                         | Sc x 2                   |                      |                              |
| Mouse 5                            |                         | Sc x 2                   |                      |                              |
| Mouse 6                            |                         | Sc x 2                   |                      |                              |
| Mouse 7                            |                         | Sc x 2                   | Sc x 2               |                              |
| Mouse 8                            |                         | Sc x 2                   | Sc x 2               |                              |
| Mouse 9                            |                         | Sc x 2                   | Sc x 2               |                              |
| Mouse 10                           |                         | Sc x 2                   | Sc x 2               |                              |
| Mouse 11                           |                         | Sc x 2                   | Sc x 2               |                              |
| Mouse 12                           |                         | Sc x 2                   | Sc x 2               |                              |
| <i>IV disseminated tumor model</i> |                         |                          |                      |                              |
| Mouse 13                           | Sk, Sa, Mb              | Sa, Mb                   |                      | Sa, Mb                       |
| Mouse 14                           | Sk                      | 0                        |                      | 0                            |
| Mouse 15                           | Sk, Sa, Ln              | Sa, Ln                   |                      | Sa, Ln                       |
| Mouse 16                           | Sk, Sa, Iw              | Sa, Iw                   |                      | Sk, Sa, Iw                   |
| Mouse 17                           | Sk, Sa, Mb              | Sk, Sa, Mb               |                      | Sk, Sa, Mb                   |
| Mouse 18                           | Sk                      | Sk                       | Sk                   |                              |
| Mouse 19                           | St, Mb                  | St, Mb                   | -                    |                              |
| Mouse 20                           | Sk, Sp                  | Sk, Sp                   | Sk                   |                              |

Lesional territories: Sc: subcutaneous; Ln: lymph node; Sk: skull; Sa: Sacrum, Iw: iliac wing; Mb: member; St: sternum, Sp: spine.
